# Supplementary material for: Preparation of deep eutectic solvent/graphene composite materials and their removal from fuel organic sulfide performance research
Source: Royal Society of Chemistry journal article supplement (doi:10.1039/d1nj02447g), 2021-01-01
Supplement: d1nj02447g1.pdf [file d1nj02447g1.pdf]

## Supporting Information

### Preparation of deep eutectic solvents/graphene composite material and its removal from fuel Organic sulfide performance research

Yue Liu,\* Xia Li, Xin Zhou, Yingna Cui,

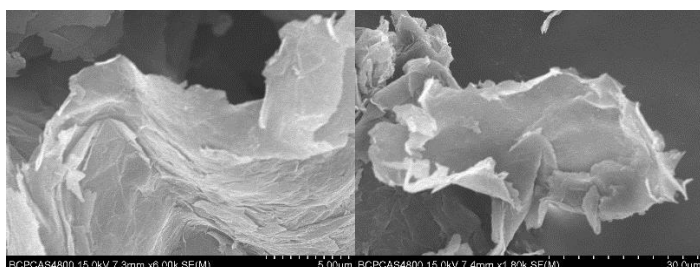

**Figure S1.** SEM image of rGO raw material.

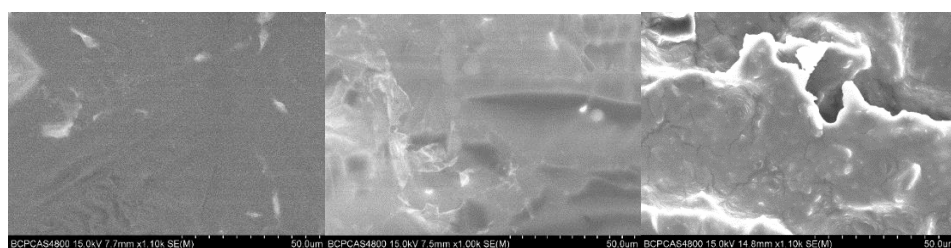

**Figure S2.** SEM images of TBAC/2p-TsOH/rGO under different mass ratio conditions (m(DESs):m(rGO)=50:1 40:1 30:1)
